# Supplementary material for: Ligation of newly replicated DNA controls the timing of DNA mismatch repair
Source: PubMed Central journal article supplement — Curr Biol. Author manuscript; Available in PMC 2021 Jul 15. (PMC8281387; doi:10.1016/j.cub.2020.12.018), 2021-01-07
Supplement: NIHMS1719725-supplement-1.pdf [file NIHMS1719725-supplement-1.pdf]

**Current Biology, Volume 31**

**Supplemental Information**

**Ligation of newly replicated DNA controls**

**the timing of DNA mismatch repair**

**Gloria X. Reyes, Anna Kolodziejczak, Lovely Jael Paul Solomon Devakumar, Takashi Kubota, Richard D. Kolodner, Christopher D. Putnam, and Hans Hombauer**

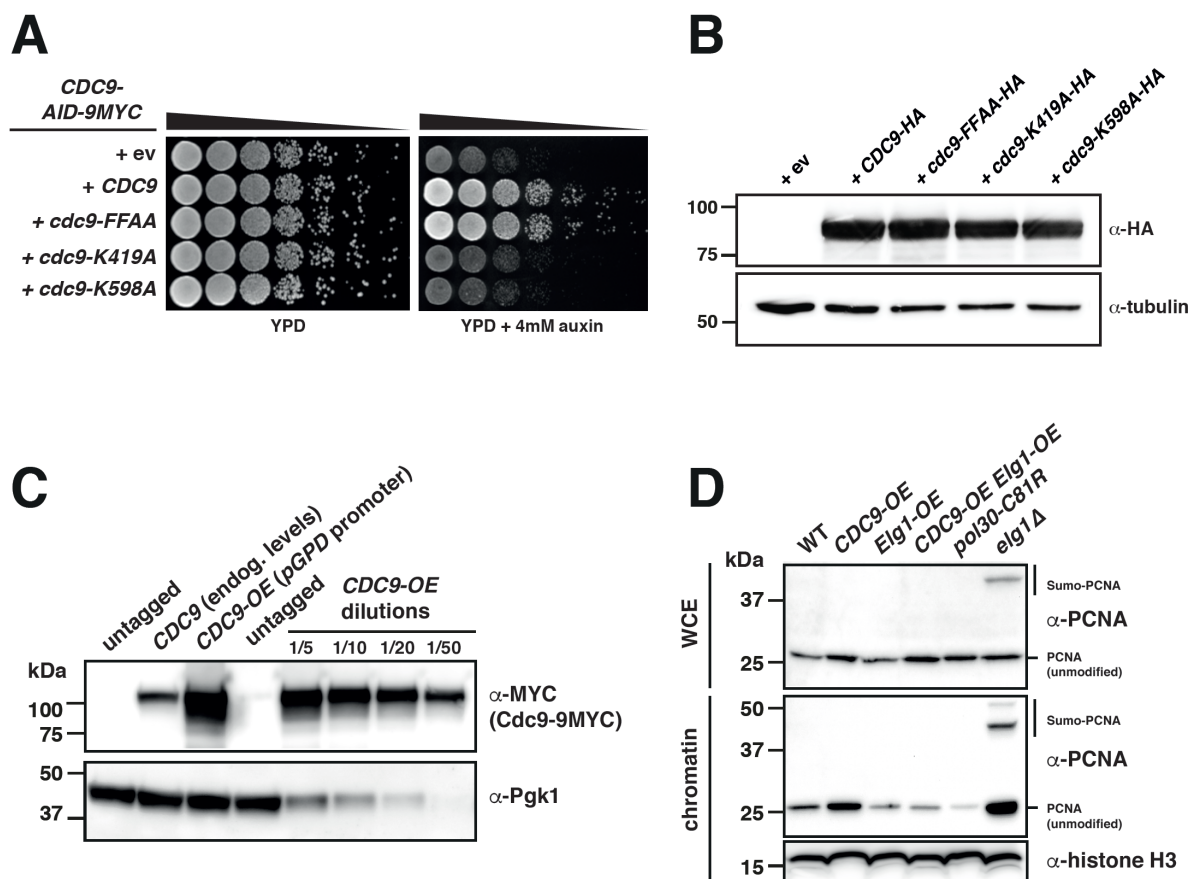

**Figure S1. Validation of the function of plasmid-borne *CDC9* alleles and characterization of *CDC9* overexpressing strains. Related to Figure 1, 2 and 3 and Table S2.**

(A) High copy number vectors were tested for their ability to complement a chromosomally encoded version of *CDC9* fused to the auxin-inducible degron. Plasmids expressing WT *CDC9* or *cdc9-FFAA*, which encodes a version of Cdc9 that cannot interact with PCNA *in vitro*, allowed cells to grow on YPD containing 4 mM auxin. In contrast, an empty vector (ev) control and both ligase-defective mutant alleles (*cdc9-K419A* and *cdc9-K598A*) could not. (B) Western blot analysis indicating expression levels of WT-Cdc9 or *cdc9* mutant alleles (tagged with a C-terminal HA-tag) expressed from high copy number plasmids. An antibody against tubulin was used as a loading control. (C) Western blot analysis showing Cdc9 protein levels in yeast strains expressing the *CDC9* gene at endogenous levels (endog. levels) or under the control of the strong constitutive promoter (pGPD), resulting in Cdc9-overexpression (*CDC9-OE*). To facilitate the visualization of the Cdc9 protein, the chromosomal *CDC9* gene was tagged at the C-terminus with a 9xMYC tag. (D) Abundance of PCNA in whole cell extracts (WCE) and chromatin-enriched fractions (chromatin) in the indicated mutant strains. Strains carrying the *pol30-C81R* and *elg1 $\Delta$*  mutations, which were previously shown to have reduced or increased chromatin-bound PCNA levels, respectively [S1, S2], were included as controls. Inactivation of Elg1 results in an increase of Sumo-PCNA as previously reported [S2, S3]. Histone H3 was used as a chromatin-loading control.

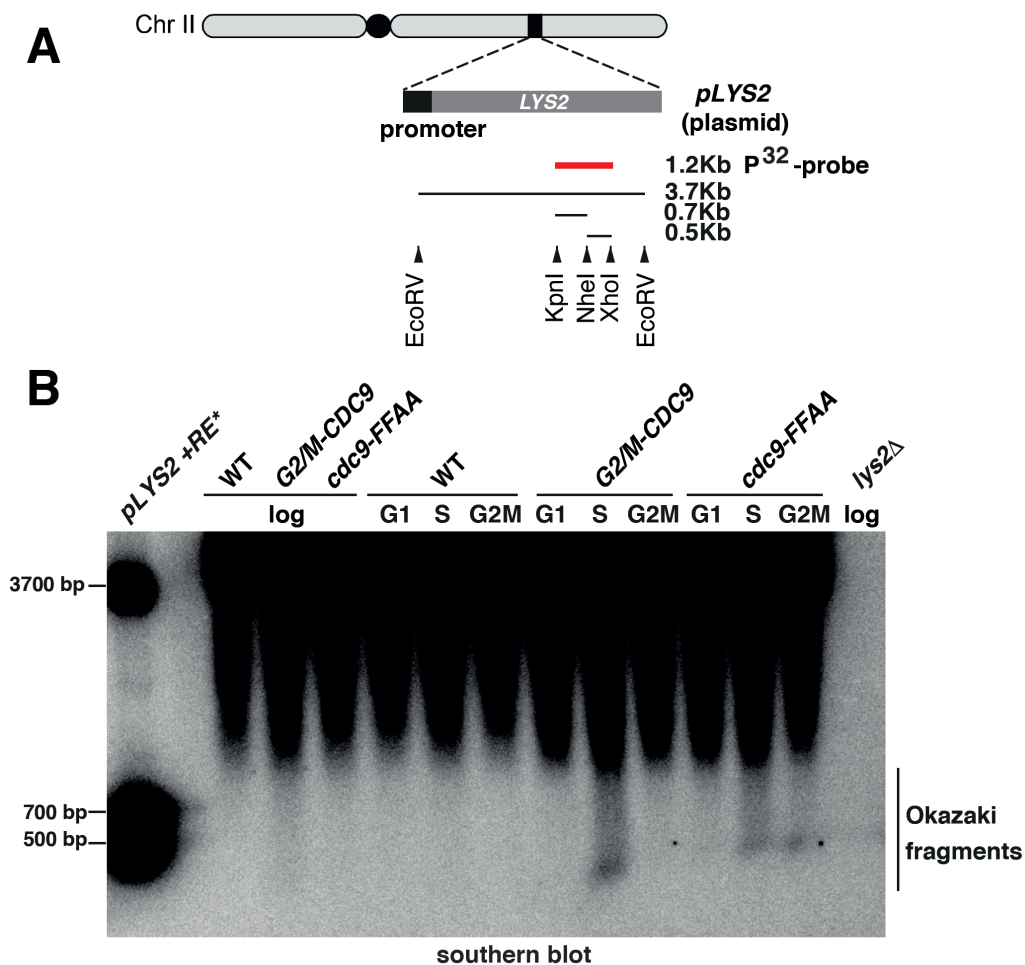

**Figure S2. *CDC9* alleles with delayed (*G2/M-CDC9*) or reduced (*cdc9-FFAA*) ligase activity results in accumulation of unprocessed Okazaki fragments at the *LYS2* locus. Related to Figure 4.**

(A) Diagram showing the strategy used for the generation of the  $P^{32}$ -probe used for detection of Okazaki fragments at the *LYS2* locus by Southern blotting. (B) Southern blot analysis used for the detection of Okazaki fragments at the *LYS2* locus in WT and the *G2/M-CDC9* or the *cdc9-FFAA* mutant strains either growing logarithmically (log), arrested in G1 phase by alpha-factor ( $\alpha$ -F), synchronized in S phase (30 min release after  $\alpha$ -F) or synchronized in G2/M phase (90 min release after  $\alpha$ -F). A *LYS2* deficient strain (*lys2Δ*) was used as a control for *LYS2*- $P^{32}$  probe specificity. As a positive control, a plasmid harboring the *LYS2* gene was digested with either *EcoR* V (detected as a 3.7 kb fragment) or *Kpn* I +*Nhe* I +*Xho* I (detected as 0.5 and 0.7 kb fragments) and pooled (*pLYS2+RE\**).

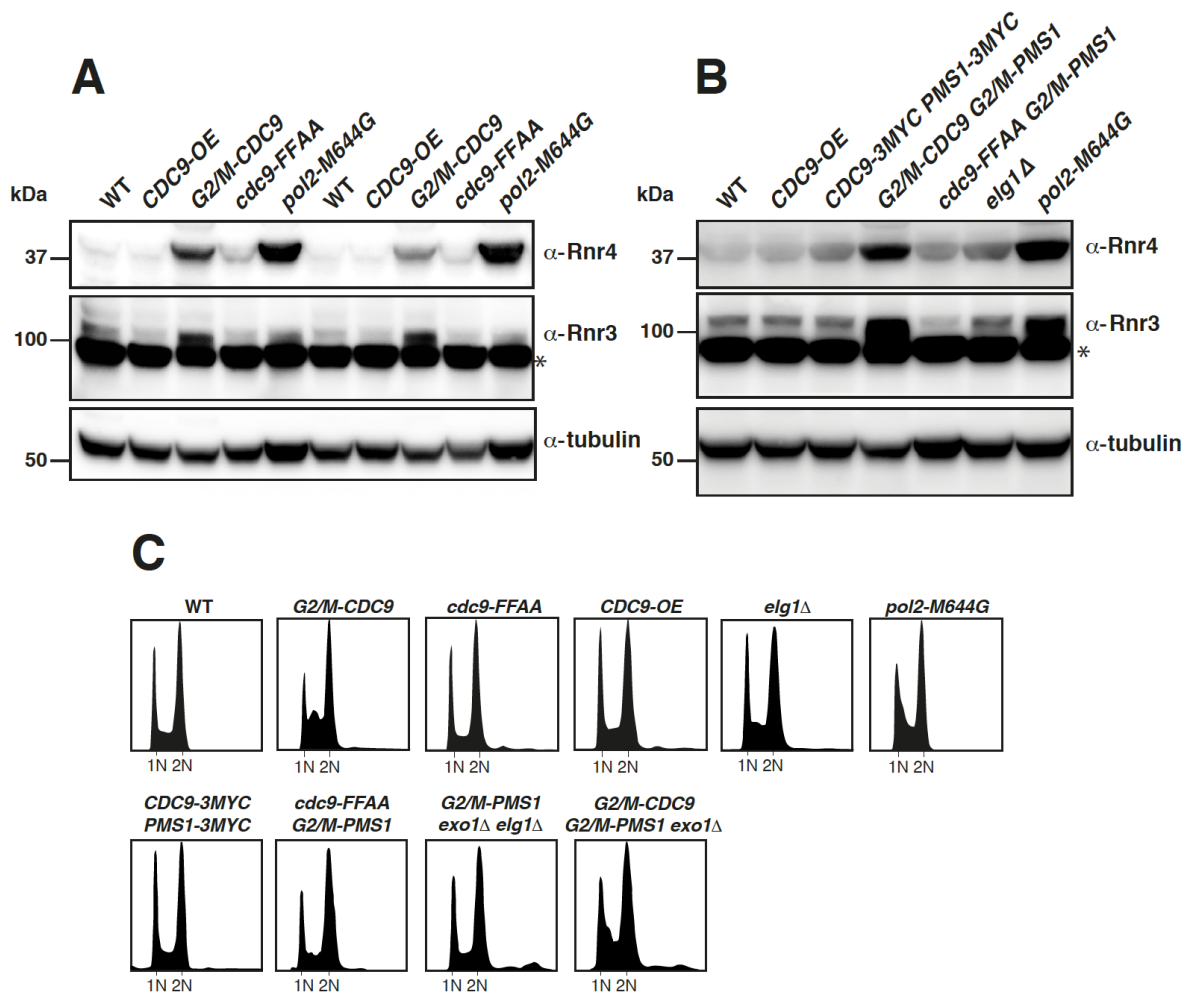

**Figure S3. Delayed ligation of Okazaki fragments in the *G2/M-CDC9* mutant results in activation of the DNA damage response and accumulation of cells in S phase.**

**Related to Figure 4.**

(A, B) Whole cell lysates of the indicated strains were analyzed by western blotting with antibodies recognizing DNA damage-inducible ribonucleotide reductase subunits Rnr3 and Rnr4 [S4, S5]. A mutant strain expressing the *pol2-M644G* allele that results in activation of the DNA damage response [S6, S7] was included as a positive control. \* denotes a cross-reacting protein. Tubulin was used as a loading control. (C) DNA content analysis of the indicated logarithmically growing strains.

| Relevant genotype                            | Mutation Rate (fold increase) <sup>*</sup> |                                        |                                        |
|----------------------------------------------|--------------------------------------------|----------------------------------------|----------------------------------------|
|                                              | Ura <sup>+</sup> Lys <sup>+</sup>          | Ura <sup>+</sup> Thr <sup>+</sup>      | Ura <sup>+</sup> Can <sup>R</sup>      |
| wild-type + pRS426                           | 1.1 [0.8-2.8] x 10 <sup>-7</sup> (1)       | 1.5 [0.8-2.6] x 10 <sup>-8</sup> (1)   | 7.7 [4.4-16.8] x 10 <sup>-7</sup> (1)  |
| wild-type + pRS426- <i>CDC9</i>              | 1.0 [0.5-1.8] x 10 <sup>-6</sup> (9)       | 6.8 [3.3-11.4] x 10 <sup>-8</sup> (4)  | 2.0 [1.5-2.5] x 10 <sup>-6</sup> (3)   |
| <i>exo1Δ</i> + pRS426                        | 3.0 [1.3-6.1] x 10 <sup>-7</sup> (3)       | 1.6 [0.6-2.2] x 10 <sup>-8</sup> (1)   | 2.5 [2.2-3.2] x 10 <sup>-6</sup> (3)   |
| <i>exo1Δ</i> + pRS426- <i>CDC9</i>           | 1.0 [0.7-1.6] x 10 <sup>-4</sup> (940)     | 2.2 [1.8-3.1] x 10 <sup>-6</sup> (144) | 9.4 [6.2-21.7] x 10 <sup>-6</sup> (12) |
| <i>exo1Δ</i> + pRS426- <i>cdc9-F44A-F45A</i> | 4.1 [2.2-8.1] x 10 <sup>-6</sup> (38)      | 6.4 [4.7-11.9] x 10 <sup>-8</sup> (4)  | 3.6 [2.8-4.4] x 10 <sup>-6</sup> (5)   |
| <i>exo1Δ</i> + pRS426- <i>cdc9-K419A</i>     | 2.7 [1.3-4.6] x 10 <sup>-7</sup> (2)       | 1.6 [1.3-2.6] x 10 <sup>-8</sup> (1)   | 2.5 [1.8-3.7] x 10 <sup>-6</sup> (3)   |
| <i>exo1Δ</i> + pRS426- <i>cdc9-K598A</i>     | 4.1 [2.6-9.5] x 10 <sup>-7</sup> (4)       | 1.8 [0.8-3.2] x 10 <sup>-8</sup> (1)   | 2.6 [1.9-3.4] x 10 <sup>-6</sup> (3)   |

**Table S1. Mutation rate analysis in strains overexpressing WT-*CDC9* and *cdc9* mutant alleles. Related to Figure 1A.**

<sup>\*</sup> Median rates of *lys2-10A* (Ura<sup>+</sup> Lys<sup>+</sup>) and *hom3-10* (Ura<sup>+</sup> Thr<sup>+</sup>) frameshift reversion and inactivation of *CAN1* gene (Ura<sup>+</sup> Can<sup>R</sup>) assays with 95% confidence interval in square brackets and fold increase relative to the wild-type in parentheses.

| Relevant genotype                 | Mutation Rate (fold increase) <sup>*</sup> |                                          |                                        |
|-----------------------------------|--------------------------------------------|------------------------------------------|----------------------------------------|
|                                   | Lys <sup>+</sup>                           | Thr <sup>+</sup>                         | Can <sup>R</sup>                       |
| wild-type                         | 1.5 [0.8-2.2] x 10 <sup>-8</sup> (1)       | 2.1 [1.4-3.2] x 10 <sup>-9</sup> (1)     | 7.2 [5.7-9.0] x 10 <sup>-8</sup> (1)   |
| <i>msh2Δ</i>                      | 9.9 [8.1-10.8] x 10 <sup>-5</sup> (6771)   | 6.3 [5.2-12.8] x 10 <sup>-6</sup> (3053) | 5.4 [4.4-7.2] x 10 <sup>-6</sup> (75)  |
| <i>CDC9-OE</i>                    | 6.0 [4.6-6.9] x 10 <sup>-8</sup> (4)       | 5.4 [4.2-6.3] x 10 <sup>-9</sup> (3)     | 1.1 [0.8-1.4] x 10 <sup>-7</sup> (2)   |
| <i>exo1Δ</i>                      | 9.8 [6.9-22.8] x 10 <sup>-8</sup> (7)      | 5.2 [3.3-7.9] x 10 <sup>-9</sup> (3)     | 4.3 [2.9-8.7] x 10 <sup>-7</sup> (6)   |
| <i>CDC9-OE exo1Δ</i>              | 6.1 [3.4-12.1] x 10 <sup>-6</sup> (416)    | 3.7 [2.8-5.7] x 10 <sup>-7</sup> (180)   | 1.3 [1.1-1.5] x 10 <sup>-6</sup> (18)  |
| <i>exo1-FFAA-Δ571-702</i>         | 3.6 [2.9-5.3] x 10 <sup>-8</sup> (2)       | 2.8 [2.0-4.7] x 10 <sup>-9</sup> (1)     | 8.2 [6.3-17.5] x 10 <sup>-8</sup> (1)  |
| <i>CDC9-OE exo1-FFAA-Δ571-702</i> | 6.7 [4.4-10.8] x 10 <sup>-6</sup> (457)    | 3.4 [1.6-5.6] x 10 <sup>-7</sup> (163)   | 1.7 [0.7-2.8] x 10 <sup>-6</sup> (24)  |
| <i>pol30-K217E</i>                | 1.2 [0.8-2.4] x 10 <sup>-6</sup> (85)      | 4.1 [3.5-6.4] x 10 <sup>-8</sup> (20)    | 5.1 [3.9-10.7] x 10 <sup>-7</sup> (7)  |
| <i>pol30-K217E exo1Δ</i>          | 5.5 [4.8-7.0] x 10 <sup>-5</sup> (3772)    | 2.7 [1.6-4.2] x 10 <sup>-6</sup> (1317)  | 7.1 [3.7-10.8] x 10 <sup>-6</sup> (99) |
| <i>CDC9-OE pol30-K217E</i>        | 6.9 [6.1-9.5] x 10 <sup>-6</sup> (474)     | 2.1 [1.5-3.1] x 10 <sup>-7</sup> (103)   | 1.2 [1.0-1.3] x 10 <sup>-6</sup> (16)  |
| <i>CDC9-OE exo1Δ pol30-K217E</i>  | 3.0 [2.2-4.2] x 10 <sup>-4</sup> (20751)   | 2.1 [1.4-3.3] x 10 <sup>-5</sup> (10089) | 2.0 [1.4-3.1] x 10 <sup>-5</sup> (278) |
| <i>pms1-A99V</i>                  | 4.0 [1.7-7.3] x 10 <sup>-7</sup> (27)      | 6.3 [4.0-9.7] x 10 <sup>-8</sup> (30)    | 4.0 [1.9-7.5] x 10 <sup>-7</sup> (6)   |
| <i>CDC9-OE pms1-A99V</i>          | 7.9 [3.4-12.4] x 10 <sup>-6</sup> (543)    | 1.4 [0.7-2.2] x 10 <sup>-6</sup> (688)   | 1.5 [1.1-1.7] x 10 <sup>-6</sup> (20)  |
| <i>CDC9-OE msh2Δ</i>              | 1.2 [0.6-2.0] x 10 <sup>-4</sup> (7948)    | 1.4 [0.9-2.1] x 10 <sup>-5</sup> (6533)  | 2.9 [1.1-3.7] x 10 <sup>-5</sup> (405) |
| <i>rnh201Δ</i>                    | 2.1 [1.7-3.3] x 10 <sup>-8</sup> (2)       | 5.5 [4.2-7.4] x 10 <sup>-9</sup> (3)     | 1.3 [0.8-1.9] x 10 <sup>-7</sup> (2)   |
| <i>CDC9-OE rnh201Δ</i>            | 9.6 [7.2-20.0] x 10 <sup>-8</sup> (7)      | 2.6 [1.9-3.2] x 10 <sup>-8</sup> (13)    | 6.0 [3.1-10.0] x 10 <sup>-7</sup> (8)  |
| <i>exo1Δ rnh201Δ</i>              | 2.0 [1.3-3.3] x 10 <sup>-7</sup> (14)      | 1.7 [1.2-3.1] x 10 <sup>-8</sup> (8)     | 8.0 [6.7-10.0] x 10 <sup>-7</sup> (11) |
| <i>CDC9-OE exo1Δ rnh201Δ</i>      | 1.0 [0.5-2.0] x 10 <sup>-5</sup> (716)     | 1.2 [0.7-1.8] x 10 <sup>-6</sup> (561)   | 4.7 [1.8-6.6] x 10 <sup>-6</sup> (66)  |
| <i>ELG1-OE</i>                    | 5.8 [4.2-8.2] x 10 <sup>-7</sup> (40)      | 8.5 [5.4-16.5] x 10 <sup>-9</sup> (4)    | 4.4 [3.4-6.0] x 10 <sup>-7</sup> (6)   |
| <i>ELG1-OE exo1Δ</i>              | 6.5 [4.9-8.5] x 10 <sup>-7</sup> (45)      | 4.7 [3.2-9.5] x 10 <sup>-8</sup> (23)    | 1.5 [1.0-2.0] x 10 <sup>-6</sup> (21)  |
| <i>CDC9-OE ELG1-OE</i>            | 5.6 [2.8-11.9] x 10 <sup>-7</sup> (38)     | 2.3 [1.4-3.2] x 10 <sup>-8</sup> (11)    | 5.6 [3.1-9.8] x 10 <sup>-7</sup> (8)   |
| <i>CDC9-OE exo1Δ ELG1-OE</i>      | 5.0 [2.8-7.3] x 10 <sup>-5</sup> (3387)    | 5.8 [3.5-9.1] x 10 <sup>-6</sup> (2809)  | 2.1 [1.5-3.6] x 10 <sup>-5</sup> (294) |
| <i>elg1Δ</i>                      | 1.0 [0.7-1.9] x 10 <sup>-7</sup> (7)       | 4.8 [3.4-10.2] x 10 <sup>-9</sup> (2)    | 1.8 [1.5-2.3] x 10 <sup>-7</sup> (3)   |
| <i>CDC9-OE elg1Δ</i>              | 2.3 [1.5-3.2] x 10 <sup>-7</sup> (16)      | 8.6 [5.8-11.1] x 10 <sup>-9</sup> (4)    | 3.4 [1.7-8.6] x 10 <sup>-7</sup> (6)   |
| <i>exo1Δ elg1Δ</i>                | 1.5 [0.7-2.2] x 10 <sup>-7</sup> (10)      | 1.7 [1.4-2.6] x 10 <sup>-8</sup> (8)     | 7.8 [6.0-12.3] x 10 <sup>-7</sup> (11) |
| <i>CDC9-OE exo1Δ elg1Δ</i>        | 7.0 [4.2-11.7] x 10 <sup>-7</sup> (48)     | 7.4 [4.5-11.1] x 10 <sup>-7</sup> (355)  | 3.2 [1.9-4.4] x 10 <sup>-6</sup> (44)  |

**Table S2. Increased Cdc9 ligase activity interferes with Exo1-dependent and Exo1-independent MMR. Related to Figure 2 and 3.**

\* Median rates *lys2-10A* (Lys<sup>+</sup>) and *hom3-10* (Thr<sup>+</sup>) frameshift reversion assays and inactivation of the *CAN1* gene (Can<sup>R</sup>) with 95% confidence interval in square brackets and fold increase relative to the wild-type in parentheses.

|                                         | WT*        | <i>CDC9-OE</i> | <i>exo1-F447A-F448A-Δ571-702</i> | <i>CDC9-OE<br/>exo1-F447A-F448A-Δ571-702</i> | <i>CDC9-OE<br/>msh2Δ</i> | <i>msh2Δ**</i> |
|-----------------------------------------|------------|----------------|----------------------------------|----------------------------------------------|--------------------------|----------------|
| <b>Can<sup>R</sup> clones sequenced</b> | 92         | 119            | 101                              | 92                                           | 97                       | 164            |
| <b>Mutations overall</b>                | 92 (100.0) | 119 (100.0)    | 101 (100.0)                      | 92 (100.0)                                   | 98 (100.0)               | 169 (100.0)    |
| <b>Base substitutions</b>               | 69 (75.0)  | 87 (73.1)      | 77 (76.2)                        | 25 (27.2)                                    | 20 (20.4)                | 62 (37.0)      |
| A-T → G-C                               | 6 (6.5)    | 7 (5.9)        | 5 (5.0)                          | 5 (5.4)                                      | 5 (5.1)                  | 7 (4.1)        |
| G-C → A-T                               | 18 (19.6)  | 31 (26.1)      | 28 (27.7)                        | 7 (7.6)                                      | 11 (11.2)                | 30 (17.8)      |
| G-C → T-A                               | 29 (31.5)  | 32 (26.9)      | 22 (21.8)                        | 11 (12.0)                                    | 3 (3.1)                  | 18 (10.7)      |
| A-T → C-G                               | 3 (3.3)    | 3 (2.5)        | 5 (5.0)                          | 1 (1.1)                                      | 0 (0.0)                  | 4 (2.4)        |
| A-T → T-A                               | 7 (7.6)    | 4 (3.4)        | 6 (5.9)                          | 0 (0.0)                                      | 0 (0.0)                  | 1 (0.6)        |
| C-G → G-C                               | 6 (6.5)    | 10 (8.4)       | 11 (10.9)                        | 1 (1.1)                                      | 1 (1.0)                  | 2 (1.2)        |
| Transitions                             | 24 (26.1)  | 38 (31.9)      | 33 (32.7)                        | 12 (13.0)                                    | 16 (16.3)                | 37 (21.9)      |
| Transversions                           | 45 (48.9)  | 49 (41.2)      | 44 (43.6)                        | 13 (14.1)                                    | 4 (4.1)                  | 25 (14.8)      |
| <b>One-base-pair frameshifts</b>        | 15 (16.3)  | 11 (9.2)       | 15 (14.9)                        | 58 (63.0)                                    | 78 (79.6)                | 106 (63.0)     |
| ΔA/T                                    | 5 (5.4)    | 2 (1.7)        | 7 (6.9)                          | 34 (37.0)                                    | 56 (57.1)                | 75 (44.4)      |
| ΔG/C                                    | 3 (3.3)    | 6 (5.0)        | 5 (5.0)                          | 3 (3.3)                                      | 18 (18.4)                | 15 (8.9)       |
| +A/T                                    | 6 (6.5)    | 3 (2.5)        | 2 (2.0)                          | 21 (22.8)                                    | 4 (4.1)                  | 13 (7.7)       |
| +G/C                                    | 1 (1.1)    | 0 (0.0)        | 1 (1.0)                          | 0 (0.0)                                      | 0 (0.0)                  | 3 (1.8)        |
| <b>Complex mutations<sup>†</sup></b>    | 8 (8.7)    | 21 (17.6)      | 9 (8.9)                          | 9 (9.8)                                      | 0 (0.0)                  | 1 (1.0)        |

**Table S3. *CAN1* mutation spectra in *CDC9-OE* strains and *exo1*-mutants. Related to Figure 2.**

Mutation spectra analysis based on DNA sequencing of the *CAN1* gene in independent Can<sup>R</sup> mutants, shown as the number of clones containing the indicated mutations, and in parenthesis as the percentage relative to the total. \**CAN1* mutation spectrum of WT strain was taken from [S7]. \*\* *CAN1* mutation spectrum of *msh2Δ* strain was taken from [S8].

<sup>†</sup> includes multiple mutations within ten nucleotides, insertions or deletions of more than one nucleotide and duplication events.

| type              | occurrence | length<br>deletion/<br>insertion | <i>CAN1-ORF</i><br>(nucleotides) | length<br>flanking<br>sequence |
|-------------------|------------|----------------------------------|----------------------------------|--------------------------------|
| <b>deletions</b>  |            |                                  |                                  |                                |
| <b>8/119 (7%)</b> |            |                                  |                                  |                                |
|                   | 1/119      | 16 bp                            | 76-91                            | 5 bp                           |
|                   | 2/119      | 27 bp                            | 284-310                          | 8 bp                           |
|                   | 1/119      | 49 bp                            | 762-810                          | 11/12 bp <sup>‡</sup>          |
|                   | 1/119      | 15 bp                            | 1134-1148                        | 6 bp                           |
|                   | 1/119      | 63 bp                            | 1286-1348                        | 8 bp                           |
|                   | 1/119      | 16 bp                            | 1324-1339                        | 4 bp                           |
|                   | 1/119      | 39 bp                            | 1625-1663                        | 6 bp                           |
| <b>insertions</b> |            |                                  |                                  |                                |
| <b>9/119 (8%)</b> |            |                                  |                                  |                                |
|                   | 1/119      | 32 bp                            | 225-256                          | 6 bp                           |
|                   | 1/119      | 18 bp                            | 290-307                          | 4 bp                           |
|                   | 1/119      | 33 bp                            | 399-431                          | 4 bp                           |
|                   | 1/119      | 128 bp                           | 688-815                          | none                           |
|                   | 1/119*     | 49 bp                            | 762-810                          | 11/12 bp <sup>‡</sup>          |
|                   | 1/119      | 72 bp                            | 1265-1336                        | 7 bp                           |
|                   | 1/119      | 50 bp                            | 1384-1433                        | 5 bp                           |
|                   | 1/119      | 38 bp                            | 1580-1617                        | 6 bp                           |
|                   | 1/119      | 32 bp                            | 1667-1698                        | 5 bp                           |

**Table S4. Complex deletions and insertions found in the *CDC9-OE* strain (*CAN1* mutation spectrum). Related to Figure 2.**

\* mutation reported in the *rad27Δ CAN1* mutation spectrum [S9]. ‡ the sequence of the upstream flanking repeat is GGTGCTGGGGT (11 nt) and the sequence of the downstream flanking repeat is GGTGCCTGGGGT (12 nt).



| Relevant genotype                        | Mutation Rate (fold increase) <sup>†</sup> |                                         |                                       |
|------------------------------------------|--------------------------------------------|-----------------------------------------|---------------------------------------|
|                                          | Lys <sup>+</sup>                           | Thr <sup>+</sup>                        | Can <sup>R</sup>                      |
| wild-type                                | 1.5 [0.8-2.2] x 10 <sup>-8</sup> (1)       | 2.1 [1.4-3.2] x 10 <sup>-9</sup> (1)    | 7.2 [5.7-9.0] x 10 <sup>-8</sup> (1)  |
| <i>G2/M-MSH6 msh3Δ</i> <sup>#</sup>      | 2.9 [1.7-4.7] x 10 <sup>-5</sup> (1983)    | 4.3 [3.3-5.5] x 10 <sup>-6</sup> (2069) | 2.9 [2.1-4.3] x 10 <sup>-6</sup> (40) |
| <i>G2/M-CDC9</i>                         | 8.0 [3.9-13.1] x 10 <sup>-9</sup> (5)      | 7.2 [4.8-10.0] x 10 <sup>-9</sup> (3)   | 4.0 [3.2-6.0] x 10 <sup>-7</sup> (6)  |
| <i>G2/M-MSH6 msh3Δ G2/M-CDC9</i>         | 2.7 [1.7-3.9] x 10 <sup>-5</sup> (1813)    | 2.8 [1.5-4.1] x 10 <sup>-6</sup> (1330) | 3.5 [2.2-4.8] x 10 <sup>-6</sup> (49) |
| <i>G2/M-PMS1</i>                         | 6.1 [5.1-9.2] x 10 <sup>-6</sup> (418)     | 1.8 [1.3-2.4] x 10 <sup>-7</sup> (87)   | 5.9 [2.3-7.5] x 10 <sup>-7</sup> (8)  |
| <i>G2/M-PMS1 G2/M-CDC9</i>               | 1.1 [0.8-1.5] x 10 <sup>-6</sup> (76)      | 4.2 [1.7-5.6] x 10 <sup>-8</sup> (20)   | 5.7 [4.3-10.1] x 10 <sup>-7</sup> (8) |
| <i>G2/M-PMS1 cdc9-FFAA</i>               | 2.8 [1.5-4.1] x 10 <sup>-6</sup> (194)     | 3.8 [2.7-6.5] x 10 <sup>-8</sup> (18)   | 2.1 [1.4-3.1] x 10 <sup>-7</sup> (3)  |
| <i>G2/M-PMS1 exo1Δ</i>                   | 4.6 [3.3-5.8] x 10 <sup>-5</sup> (3118)    | 2.1 [1.4-3.1] x 10 <sup>-6</sup> (991)  | 2.7 [1.9-3.2] x 10 <sup>-6</sup> (38) |
| <i>G2/M-PMS1 lys2-10A<sub>LATE</sub></i> | 1.5 [1.4-1.9] x 10 <sup>-6</sup> (105)     | 1.2 [1.0-1.4] x 10 <sup>-7</sup> (59)   | 2.3 [1.8-3.4] x 10 <sup>-7</sup> (3)  |
| <i>G2/M-PMS1 exo1Δ G2/M-CDC9</i>         | 2.3 [1.1-3.8] x 10 <sup>-6</sup> (157)     | 6.1 [4.4-8.0] x 10 <sup>-8</sup> (29)   | 1.4 [1.0-2.0] x 10 <sup>-6</sup> (20) |
| <i>cdc9-FFAA</i>                         | 1.2 [1.0-1.7] x 10 <sup>-8</sup> (1)       | 3.4 [1.6-5.3] x 10 <sup>-9</sup> (2)    | 8.5 [7.3-17.3] x 10 <sup>-8</sup> (1) |
| <i>G2/M-PMS1 exo1Δ cdc9-FFAA</i>         | 7.8 [4.9-11.9] x 10 <sup>-6</sup> (536)    | 1.6 [0.9-2.4] x 10 <sup>-7</sup> (78)   | 1.1 [0.5-1.4] x 10 <sup>-6</sup> (15) |
| <i>G2/M-PMS1 exo1Δ elg1Δ</i>             | 1.2 [0.9-1.4] x 10 <sup>-5</sup> (794)     | 5.2 [3.4-9.4] x 10 <sup>-7</sup> (249)  | 1.8 [1.3-2.8] x 10 <sup>-6</sup> (26) |

**Table S5. MMR defect caused by the *G2/M-PMS1* allele is largely suppressed by delaying *Cdc9* expression or reducing *Cdc9* ligase activity. Related to Figure 4.**

\*Median rates of inactivation of the *CAN1* gene (Can<sup>R</sup>) and *lys2-10A* (Lys<sup>+</sup>) and *hom3-10* (Thr<sup>+</sup>) frameshift reversion assays with 95% confidence interval in square brackets and fold increase relative to the wild-type in parentheses. # Mutation rates were taken from [S10].

## Supplemental References

- S1. Johnson, C., Gali, V.K., Takahashi, T.S., and Kubota, T. (2016). PCNA Retention on DNA into G2/M Phase Causes Genome Instability in Cells Lacking Elg1. *Cell Rep* *16*, 684-695.
- S2. Kubota, T., Nishimura, K., Kanemaki, M.T., and Donaldson, A.D. (2013). The Elg1 replication factor C-like complex functions in PCNA unloading during DNA replication. *Mol Cell* *50*, 273-280.
- S3. Kubota, T., Katou, Y., Nakato, R., Shirahige, K., and Donaldson, A.D. (2015). Replication-Coupled PCNA Unloading by the Elg1 Complex Occurs Genome-wide and Requires Okazaki Fragment Ligation. *Cell Rep* *12*, 774-787.
- S4. Elledge, S.J., and Davis, R.W. (1990). Two genes differentially regulated in the cell cycle and by DNA-damaging agents encode alternative regulatory subunits of ribonucleotide reductase. *Genes Dev* *4*, 740-751.
- S5. Kumar, D., Viberg, J., Nilsson, A.K., and Chabes, A. (2010). Highly mutagenic and severely imbalanced dNTP pools can escape detection by the S-phase checkpoint. *Nucleic Acids Res* *38*, 3975-3983.
- S6. Williams, L.N., Marjavaara, L., Knowels, G.M., Schultz, E.M., Fox, E.J., Chabes, A., and Herr, A.J. (2015). dNTP pool levels modulate mutator phenotypes of error-prone DNA polymerase epsilon variants. *Proc Natl Acad Sci U S A* *112*, E2457-2466.
- S7. Schmidt, T.T., Reyes, G., Gries, K., Ceylan, C.U., Sharma, S., Meurer, M., Knop, M., Chabes, A., and Hombauer, H. (2017). Alterations in cellular metabolism triggered by URA7 or GLN3 inactivation cause imbalanced dNTP pools and increased mutagenesis. *Proc Natl Acad Sci U S A* *114*, E4442-E4451.
- S8. Buckland, R.J., Watt, D.L., Chittoor, B., Nilsson, A.K., Kunkel, T.A., and Chabes, A. (2014). Increased and imbalanced dNTP pools symmetrically promote both leading and lagging strand replication infidelity. *PLoS genetics* *10*, e1004846.
- S9. Tishkoff, D.X., Filosi, N., Gaida, G.M., and Kolodner, R.D. (1997). A novel mutation avoidance mechanism dependent on *S. cerevisiae* RAD27 is distinct from DNA mismatch repair. *Cell* *88*, 253-263.
- S10. Hombauer, H., Srivatsan, A., Putnam, C.D., and Kolodner, R.D. (2011). Mismatch repair, but not heteroduplex rejection, is temporally coupled to DNA replication. *Science* *334*, 1713-1716.
